# Supplementary material for: Antifouling Property of Oppositely Charged Titania Nanosheet Assembled on Thin Film Composite Reverse Osmosis Membrane for Highly Concentrated Oily Saline Water Treatment
Source: MDPI journal article supplement (doi:10.3390/membranes10090237), 2020-09-16
Supplement: s1 [file s1]

1 Supplementary Materials

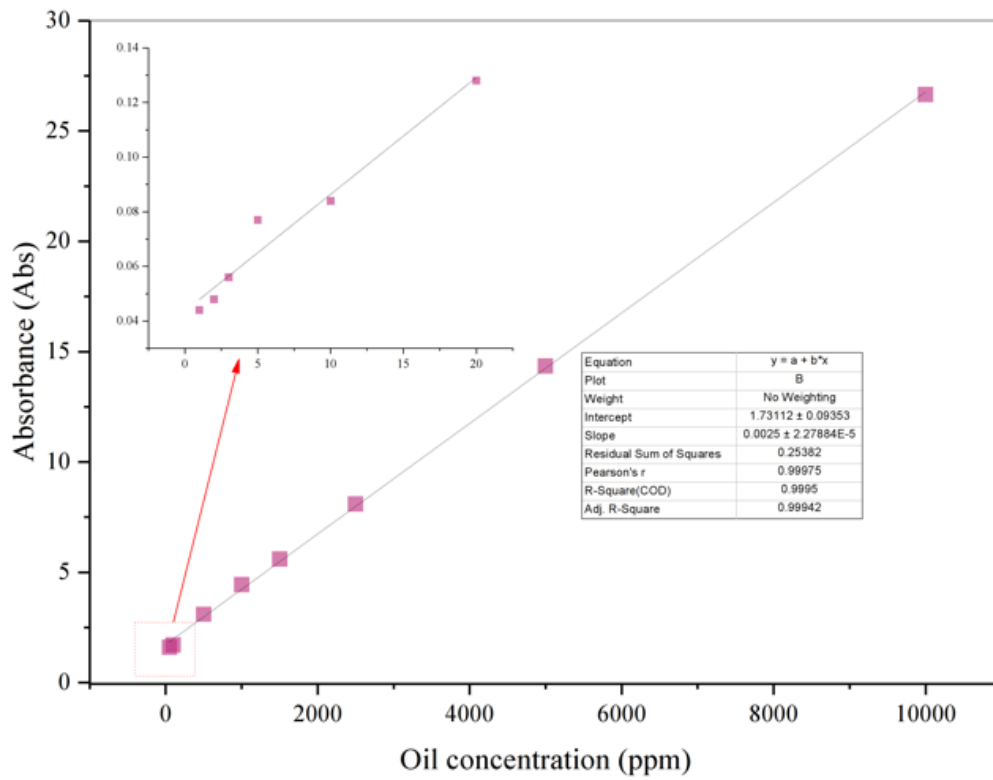

Figure S1 Calibration curve of absorbance with oily saline feedwater.

2

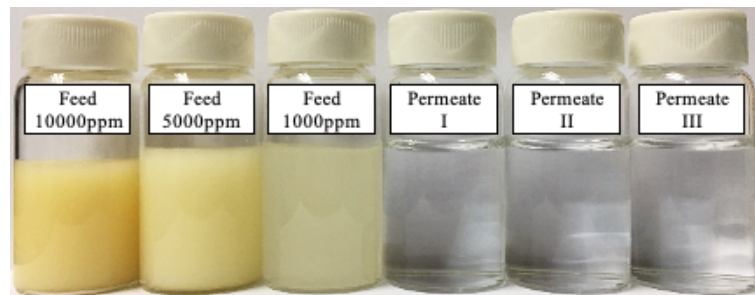

Figure 2S Photographs comparison between the synthetic oily saline wastewater with 1,000ppm, 5,000ppm and 10,000ppm as feedwater and the permeation of each concentration by 2TNS-TFN membrane.

3

4
